# Supplementary material for: EEPIC - Enhancing Employability through Positive Interventions for improving Career potential: the impact of a high support career guidance intervention on the wellbeing, hopefulness, self-efficacy and employability of the long-term unemployed - a study protocol for a randomised controlled trial
Source: Trials. 2018 Feb 26;19:141. doi: 10.1186/s13063-018-2485-y (PMC5828489; doi:10.1186/s13063-018-2485-y)
Supplement: Supplementary file 4 — Participant update questionnaire. (PDF 292 kb) [file 13063_2018_2485_MOESM4_ESM.pdf]

# EEPIC

(Enhancing Employability through Positive Interventions for increasing Career potential)

## Participant Update Questionnaire

### EMPLOYMENT

1. Are you currently employed ☐ or unemployed ☐?
  - a. Full time employed
  - b. Part time employed
  - c. Community Employment Scheme
  - d. Other
2. What is your job title: \_\_\_\_\_
3. All in all, how satisfied would you say you are with your new job? Circle your answer:  

|                      |                  |           |                |
|----------------------|------------------|-----------|----------------|
| Not at all satisfied | Fairly Satisfied | Satisfied | Very satisfied |
|----------------------|------------------|-----------|----------------|
3. How likely is it that you will actively look for another job in the next year?  

|                   |   |   |   |             |   |   |
|-------------------|---|---|---|-------------|---|---|
| 1                 | 2 | 3 | 4 | 5           | 6 | 7 |
| Not at all likely |   |   |   | Very likely |   |   |
4. How satisfied are you with your level of earnings?  

|              |   |   |                |   |
|--------------|---|---|----------------|---|
| 1            | 2 | 3 | 4              | 5 |
| Dissatisfied |   |   | Very Satisfied |   |

### EDUCATION or TRAINING

5. Are you currently registered on an education or training course relevant to your career plan?
  - ☐ Yes
  - ☐ Waiting to start
  - ☐ Already completed this training
  - ☐ No, I am not participating in education or training

Training Course Name: \_\_\_\_\_

*Thank you!*
